# Supplementary material
Source: publisher figshare collection journal article supplement (https://gsapubs.figshare.com/ndownloader/files/23308121)
Supplement: Supplementary file 1 [file 23308121]

1    **Water incorporation and retention in metamorphic olivine during subduction: Implications for**  
2    **the deep water cycle**

3

4    Elias D. Kempf\*, Jörg Hermann

5    Institute of Geological Sciences, University of Bern, Baltzerstrasse 3, 3012 Bern, Switzerland

6    Email: [elias.kempf@geo.unibe.ch](mailto:elias.kempf@geo.unibe.ch)

7

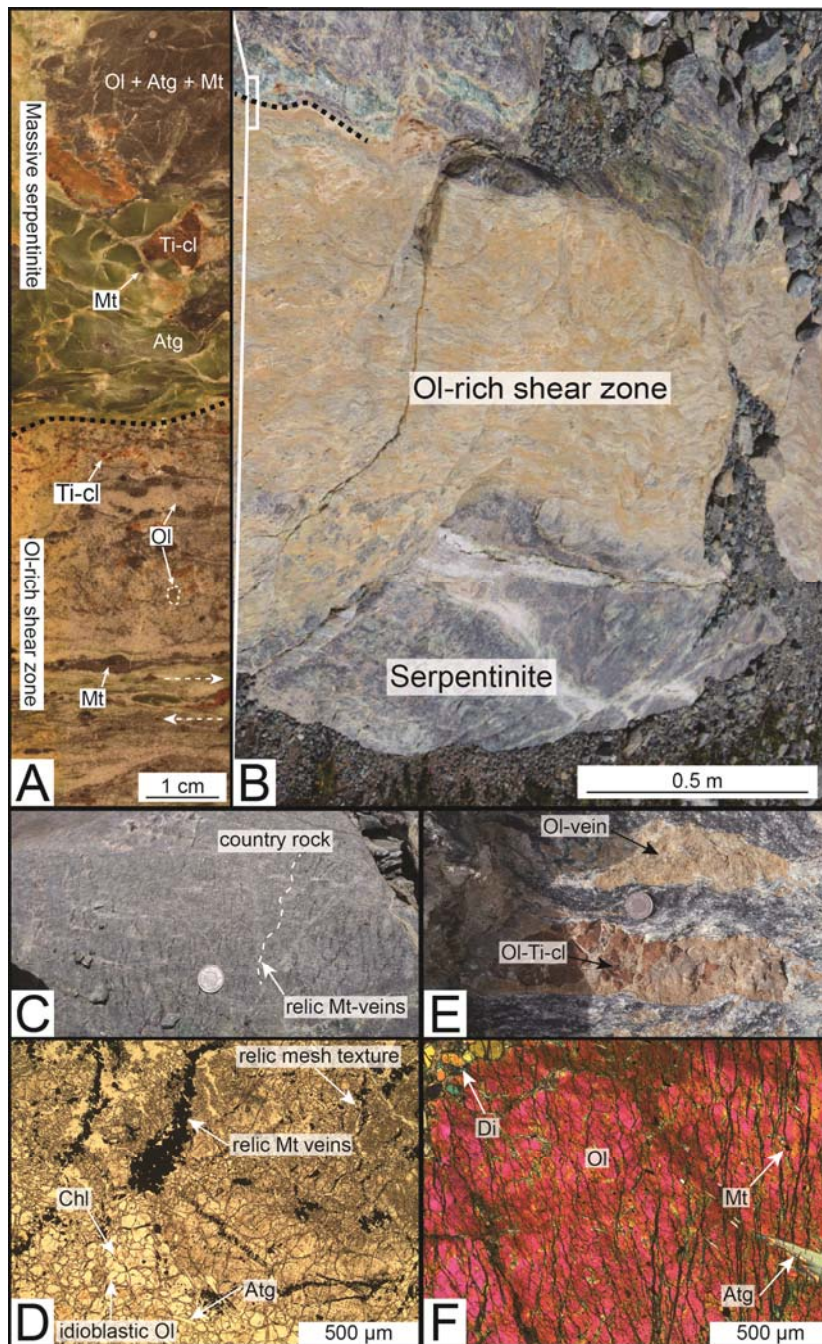

Figure DR1: (A) A polished rock slice showing the nearly undeformed serpentinite and the olivine-rich shear zone below. The sense of shear is indicated with white arrows. (B) Shear zone cutting through a serpentinite. (C) Glacier-polished outcrop of massive country rock serpentinite (FA) with static growth of olivine in a serpentine matrix. Coin (2.3 cm) for scale. (D) Relic magnetite mesh textures are overgrown by large, inclusion-rich olivines that contain variable amounts of sub-micron Ti-clinohumite (Ti-cl) lamellae (thin section microphotograph). The large olivine grains are recrystallized to smaller, clear, idioblastic grains. (E) Outcrop photo of an olivine vein containing

16 variable amounts of Ti-clinohumite and diopside (Di) (Ol26). (F) Large olivine grains (thin section  
 17 microphotograph) contain numerous inclusions of antigorite (Atg) and magnetite (Mt) and micron  
 18 sized chlorites (Chl) only identifiable in EPMA spot analysis mode.

19

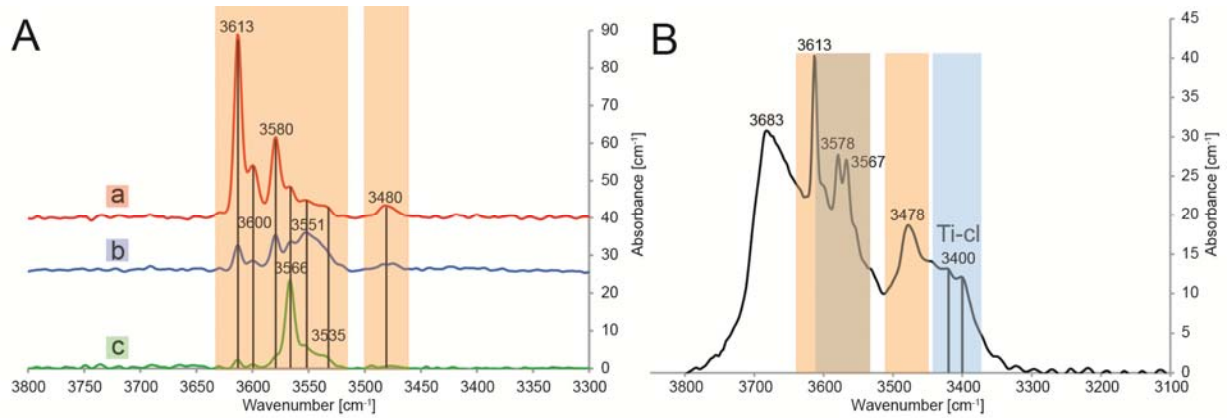

20

21 Figure DR2: (A) Characteristic absorption bands of Si-vacancies (orange shaded fields) for each  
 22 crystallographic orientation a, b and c of olivine grains from the shear zone (Ol1) scaled to 1 cm  
 23 thickness. The orientations were determined using the Si-O overtones of olivine in polarized FTIR  
 24 measurements (Asimow et al., 2006). (B) Typical unpolarised FTIR spectrum of a large olivine  
 25 grain, scaled to 1 cm thickness. The strong absorption is due to contributions from tiny serpentine  
 26 inclusions (main band at 3683 cm<sup>-1</sup>). Si-vacancy (orange shaded fields) and Ti-clinohumite lamellae  
 27 related bands (blue shaded fields) have discrete bands at 3613 cm<sup>-1</sup> and 3400 and 3417 cm<sup>-1</sup>  
 28 respectively, and overlap between 3525-3580 cm<sup>-1</sup>.

29

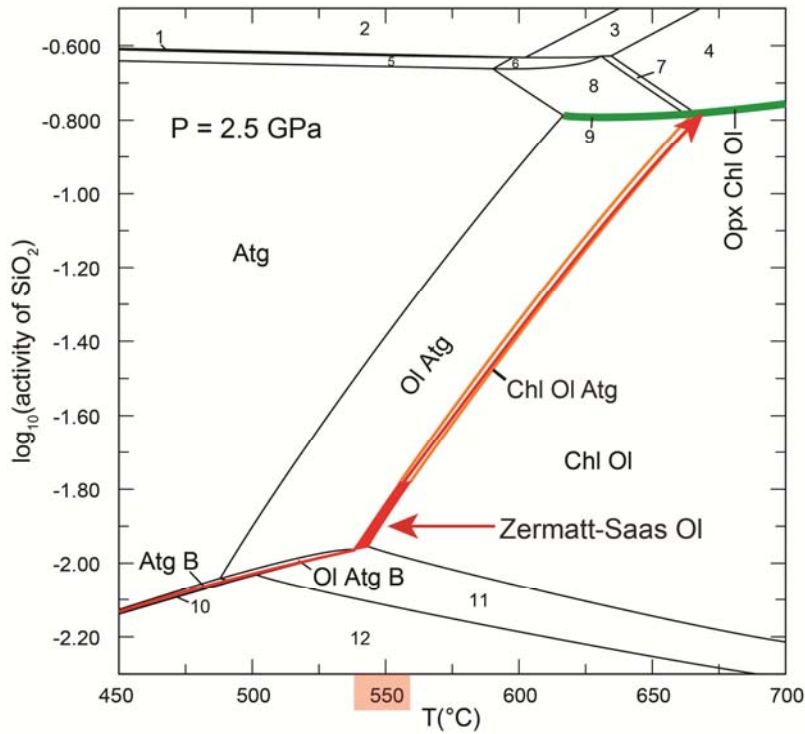

30

31 Figure DR3: SiO<sub>2</sub>-activity vs temperature diagram calculated at 2.5 GPa with Perplex (Connolly,  
 32 2009): The red line shows the increase in SiO<sub>2</sub>-activity with increasing temperatures for the  
 33 assemblages antigorite+brucite; antigorite+brucite+olivine and antigorite+chlorite+olivine. The red  
 34 area shows the SiO<sub>2</sub>-activity equilibrium conditions for the study location, at temperatures just above  
 35 the brucite-out. The green line shows that the SiO<sub>2</sub>-activity is one order of magnitude higher at the  
 36 orthopyroxene-in reaction. Solution models and corresponding author names in brackets are  
 37 presented according to Perplex solution\_model.dat-file. The numbers represent different assemblages  
 38 1: (Chl, T, Atg) 2: (Chl, T) 3: (Opx, Chl, T) 4: (Opx, Chl) 5: (T, Atg) 6: (Opx, T, Atg) 7: (Opx, Chl,  
 39 Atg) 8: (Opx, Atg) 9: (Opx, O, Atg) 10: (Chl, Atg, B) 11: (Chl, O, B) 12: Chl.

40

## 41 METHODS

42 Thick sections (approximately 200  $\mu\text{m}$  thickness for OI1, OI2, OI26 and 100  $\mu\text{m}$  for FA) were  
 43 produced from representative olivine-bearing samples and textures have been investigated by optical  
 44 microscopy and BSE imaging. Every olivine grain in this study was analysed in the following order:  
 45 EPMA, FTIR and LA-ICP-MS.

46

## 47 **FOURIER TRANSFORM INFRARED (FTIR) SPECTROSCOPY**

48 For FTIR measurements, free-standing double polished 200/100  $\mu\text{m}$  thick sections were measured  
49 with a Bruker Hyperion IR microscope in a sample chamber that is continuously flushed by dry air.  
50 Most transparent olivine grains were measured with a MCT (Mercury-Cadmium-Telluride) detector  
51 connected to a Bruker Tensor IR spectrometer. Measurements were acquired with 64 scans and an  
52 effective spectral resolution of  $4\text{ cm}^{-1}$ . Acquisition of water distribution maps was obtained with a  
53 FPA (Focal Plane Array) detector consisting of  $64 \times 64$  (4096) points acquired simultaneously. 128  
54 scans and an effective spectral resolution of  $8\text{ cm}^{-1}$  were used. Acquired spectra were base-line  
55 corrected using the concave rubber band method with 64 points and 4 iterations implemented in the  
56 Opus software. The atmospheric water compensation using the Opus software was applied to all  
57 spectra. All grains were analysed with polarized and unpolarized light for comparison. The principle  
58 axes were determined comparing overtones of the Si-O bonds ( $2200\text{-}1200\text{ cm}^{-1}$ ) with end member  
59 spectra from Asimov et al. (2006). Water concentration quantification was performed using the B  
60 integration method, accomplished with the Bruker OPUS software. Both MCT and FPA spectra were  
61 renormalized to 1 cm thickness. The thicknesses of the wavers were measured with a probe (dial)  
62 indicator with an accuracy of  $1\text{ }\mu\text{m}$  for MCT measurements. For the FPA maps potential variation in  
63 thickness was monitored using the integrated overtone approach from Shen et al. (2014). Water  
64 contents were calculated with the absorption coefficient from Bell et al. (2003). Characteristic bands  
65 were identified according to Padrón-Navarta et al. (2014). Errors given in Table1 follow the protocol  
66 given by Demouchy et al. (2015) for a homogeneous population. Taking the observed zonation  
67 shown by the FPA-map into account, the variable measurement position in different grains due to  
68 small inclusions of hydrous silicates induces a further error of similar extent. Considering only the  
69  $\pm 15\%$  error of Demouchy et al. (2015) water concentrations of all samples are within error of each  
70 other.

71

## **Electron probe micro analyser (EPMA)**

Analyses were conducted with a JEOL JXA-8200 Superprobe equipped with a tungsten filament, five wavelength dispersive crystal spectrometers (WDS) and one energy dispersive (EDS) spectrometer. A standard setup of 15 kV acceleration voltage and 20 nA probe current was used. Measurement time was set to 20 s on the peak and 10 s for either peak positions. Natural and synthetic oxide and silicate minerals were used as standards.

## **Laser ablation inductively coupled mass spectrometry (LA-ICP-MS)**

Trace element analyses were accomplished by LA-ICP-MS using a Geolas Pro 193 nm ArF excimer laser system coupled to an ELAN DRC-e quadrupole ICP-MS instrument. Optimization of the instrument and measurement strategies were adapted from Pettke et al. (2012). NIST 610 and 612 glasses were used for optimization of the detectors and the GSD-1G glass was chosen as external standard. The fluence of the laser pulses were set at  $6 \text{ J/cm}^2$  with a 10 Hz repetition. The spot sizes were between 60-120  $\mu\text{m}$  in diameter. The background was measured for 50 s. As an internal standard MgO was used from quantitative EPMA analyses (Table DR1). Data reduction was accomplished with the Matlab programme SILLS (Guillong et al., 2008).

## **THERMODYNAMIC MODELING**

The  $\text{aSiO}_2$  vs. temperature diagram was calculated for a representative bulk rock using Perplex (Connolly, 2009) and is graphically displayed in Figure DR3. The Holland and Powell (1998) data base revised in 2002 was used. The solution models O(HP), Chl(HP), Opx(HP), Band Tare from Holland and Powell (1998), Atg(PN) from Padrón-Navarta et al. (2013), for olivine, chlorite, orthopyroxene, brucite, talc and antigorite, respectively. For the determination of average brucite and olivine contents in serpentinites an average bulk rock composition was calculated from Li et al. (2004) in Table 1 without the “spinel peridotite” samples 20, 21. The volume percent of brucite and olivine were then calculated with the Perplex routine called “meemum” of the Perplex software in the



MgO-FeO-Al<sub>2</sub>O<sub>3</sub>-SiO<sub>2</sub>-H<sub>2</sub>O system assuming excess H<sub>2</sub>O (MgO: 38.28, FeO: 7.17, Al<sub>2</sub>O<sub>3</sub>: 2.72, SiO<sub>2</sub>: 39.43). The bulk for the shear zone corresponds to the bulk used for phase diagram computation (Fig. DR3), (MgO: 48.86, FeO: 3.25, Al<sub>2</sub>O<sub>3</sub>: 1.66, SiO<sub>2</sub>: 39.65) and is derived from quantitative element mapping.

## REFERENCES

- Asimow, P. D., Stein, L. C., Mosenfelder, J. L., and Rossman, G. R., 2006, Quantitative polarized infrared analysis of trace OH in populations of randomly oriented mineral grains: *American mineralogist*, v. 91, no. 2-3, p. 278-284.
- Bell, D. R., Rossman, G. R., Maldener, J., Endisch, D., and Rauch, F., 2003, Hydroxide in olivine: A quantitative determination of the absolute amount and calibration of the IR spectrum: *Journal of Geophysical Research: Solid Earth*, v. 108, no. B2, p. 2015-2113, doi:10.1029/2001JB000679.
- Connolly, J., 2009, The geodynamic equation of state: what and how: *Geochemistry, Geophysics, Geosystems*, v. 10, no. 10.
- Demouchy, S., Ishikawa, A., Tommasi, A., Alard, O., and Keshav, S., 2015, Characterization of hydration in the mantle lithosphere: Peridotite xenoliths from the Ontong Java Plateau as an example: *Lithos*, v. 212, p. 189-201.
- Guillong, M., Meier, D. L., Allan, M. M., Heinrich, C. A., and Yardley, B. W., 2008, Appendix A6: SILLS: A MATLAB-based program for the reduction of laser ablation ICP-MS data of homogeneous materials and inclusions: *Mineralogical Association of Canada Short Course*, v. 40, p. 328-333.
- Holland, T., and Powell, R., 1998, An internally consistent thermodynamic data set for phases of petrological interest: *Journal of Metamorphic Geology*, v. 16, no. 3, p. 309-343.
- Li, X. P., Rahn, M., and Bucher, K., 2004, Serpentinites of the Zermatt-Saas ophiolite complex and their texture evolution: *Journal of Metamorphic Geology*, v. 22, no. 3, p. 159-177.
- Padrón-Navarta, J. A., Hermann, J., and O'Neill, H. S. C., 2014, Site-specific hydrogen diffusion rates in forsterite: *Earth and Planetary Science Letters*, v. 392, p. 100-112.
- Padrón-Navarta, J. A., Sánchez-Vizcaíno, V. L., Hermann, J., Connolly, J. A., Garrido, C. J., Gómez-Pugnaire, M. T., and Marchesi, C., 2013, Tschermak's substitution in antigorite and consequences for phase relations and water liberation in high-grade serpentinites: *Lithos*, v. 178, p. 186-196.
- Pettke, T., Oberli, F., Audétat, A., Guillong, M., Simon, A. C., Hanley, J. J., and Klemm, L. M., 2012, Recent developments in element concentration and isotope ratio analysis of individual fluid inclusions by laser ablation single and multiple collector ICP-MS: *Ore Geology Reviews*, v. 44, p. 10-38.
- Shen, T., Hermann, J., Zhang, L., Padrón-Navarta, J. A., and Chen, J., 2014, FTIR spectroscopy of Ti-chondrodite, Ti-clinohumite, and olivine in deeply subducted serpentinites and implications for the deep water cycle: *Contributions to mineralogy and petrology*, v. 167, no. 4, p. 1-15.
